# Supplementary material for: Modeling soil and landscape evolution – the effect of rainfall and land-use change on soil and landscape patterns
Source: Copernicus journal article supplement (doi:10.5194/soil-6-337-2020), 2020-08-03
Supplement: Supplementary file [file soil-6-337-2020-supplement-title-page.pdf › soil-6-337-2020-supplement-title-page.pdf]

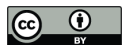

## *Supplement of*

# **Modeling soil and landscape evolution – the effect of rainfall and land-use change on soil and landscape patterns**

**W. Marijn van der Meij et al.**

*Correspondence to:* W. Marijn van der Meij ([marijn.vandermeij@wur.nl](mailto:marijn.vandermeij@wur.nl))

- [soil-6-337-2020-supplement-title-page.pdf](#)
- [S1\\_model equations and parameters\\_version2.docx](#)
- [S2\\_soilTerrainProperties.gif](#)
- [S3\\_elevationChanges.gif](#)

The copyright of individual parts of the supplement might differ from the article licence.
